# Supplementary material for: 120 years of sea-ice cover on the Northeast Greenland continental shelf: a biomarker and observational record comparison
Source: Copernicus journal article supplement (doi:10.5194/egusphere-2023-2363), 2023-11-02
Supplement: Supplementary file 1 [file egusphere-2023-2363-supplement.pdf]

Supplementary material

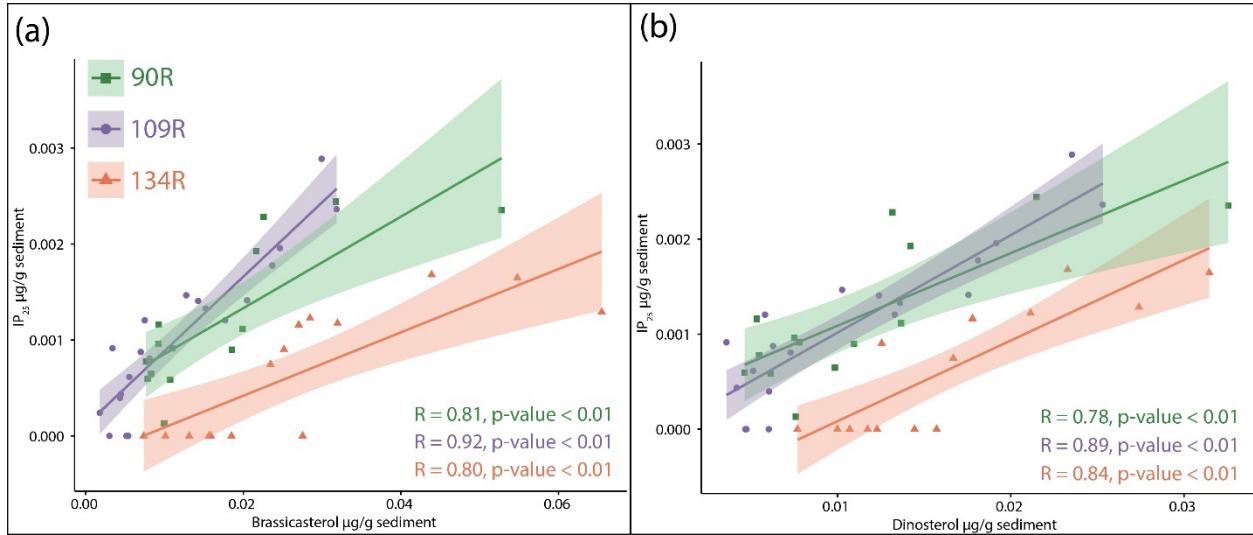

**Figure S1:** Pearson correlations of biomarkers: brassicasterol plotted against IP<sub>25</sub> (a) and dinosterol plotted against IP<sub>25</sub> (b) for all sediment cores: 90R (green), 109R (purple) and 134R (orange). The R values are listed for each core (bottom right) together with the p values.

5

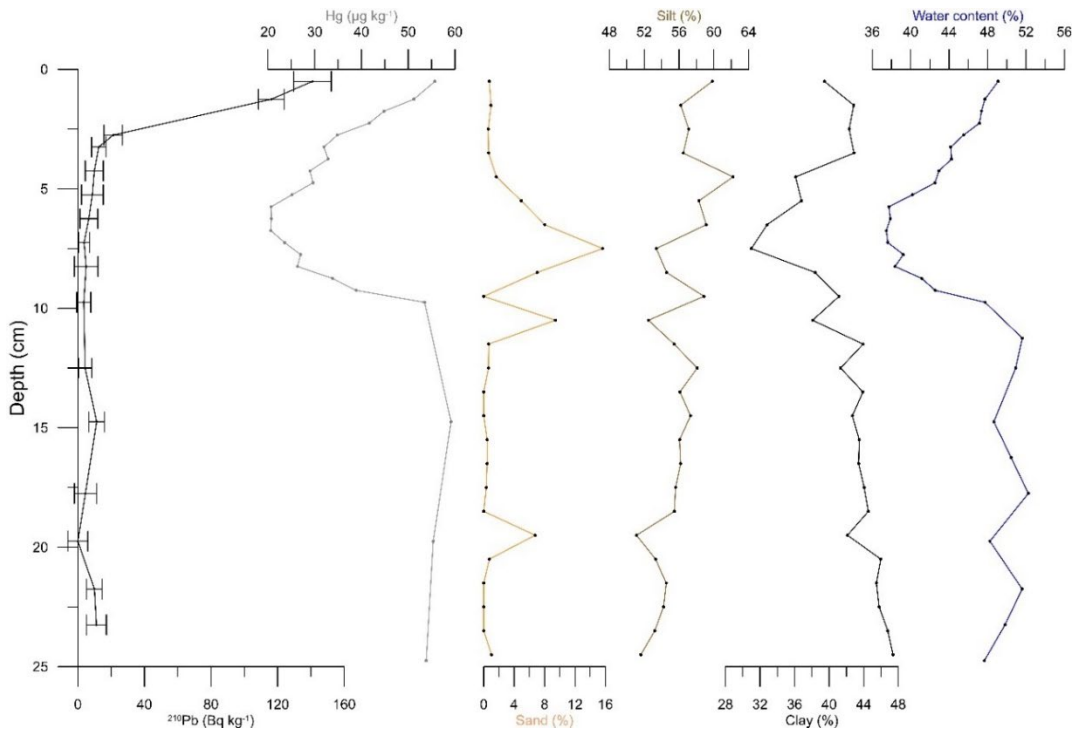

**Figure S2:** <sup>210</sup>Pb, Hg, grain size data (sand, silt and clay) and water content data for core 90R shown on depth.

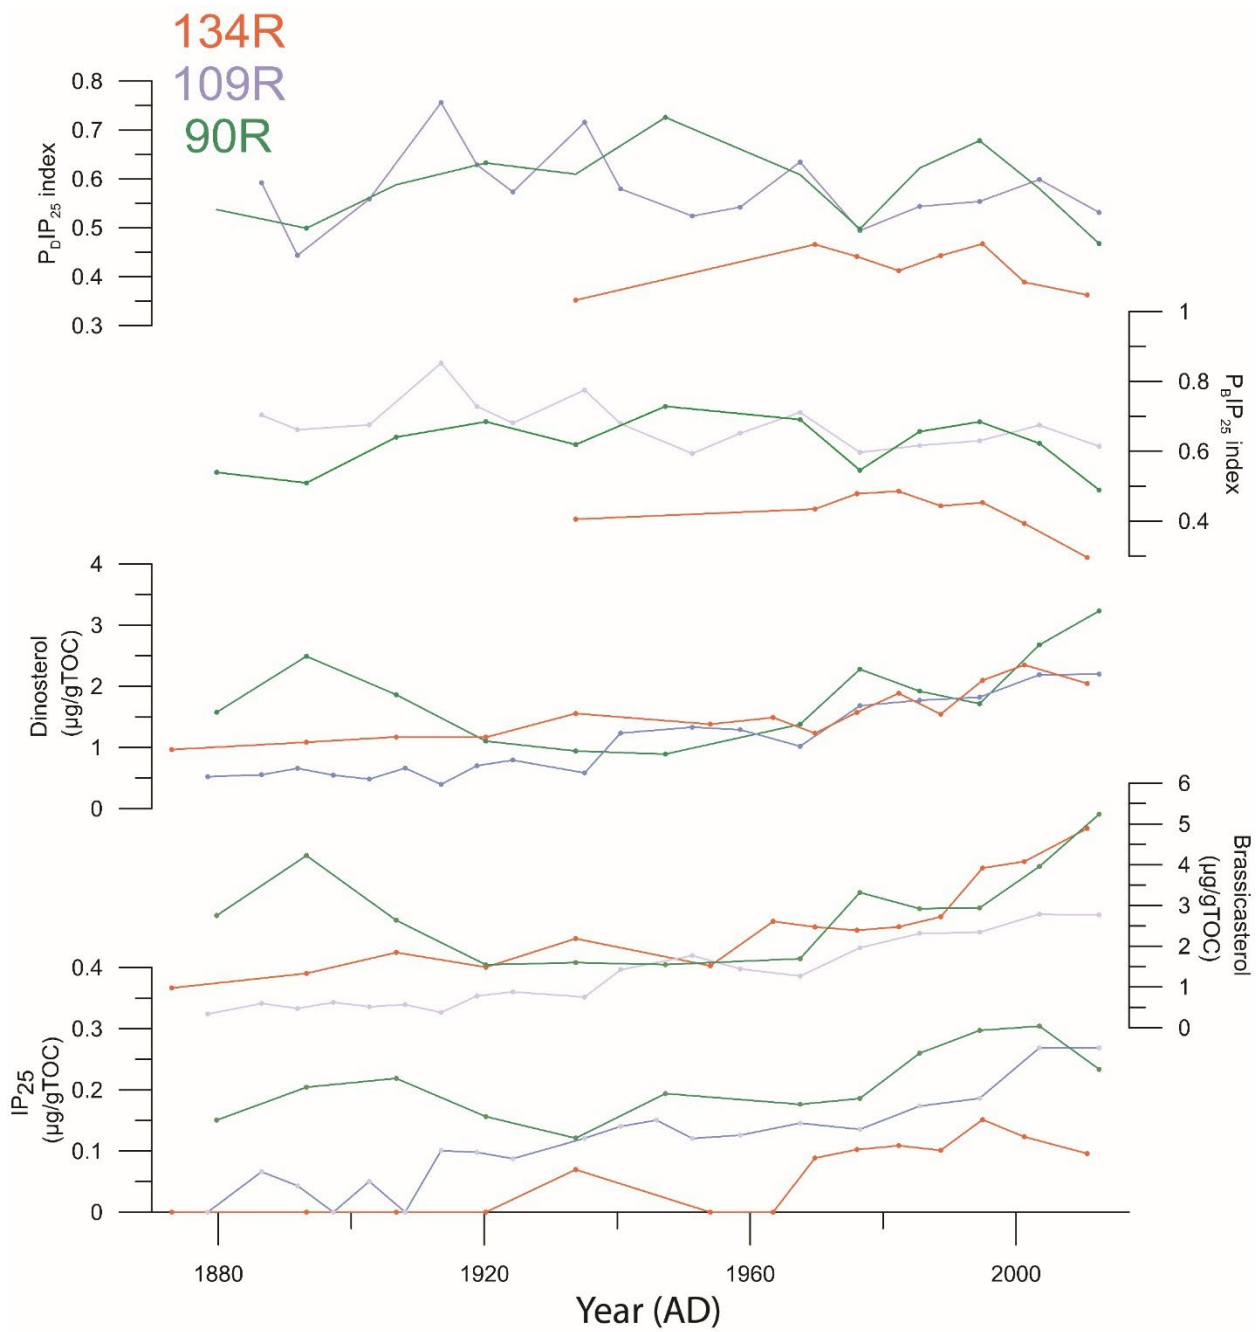

10 **Figure S3:** Comparison between the PIP<sub>25</sub> index calculated using dinosterol (P<sub>D</sub>IP<sub>25</sub>) and brassicasterol (P<sub>B</sub>IP<sub>25</sub>) values.

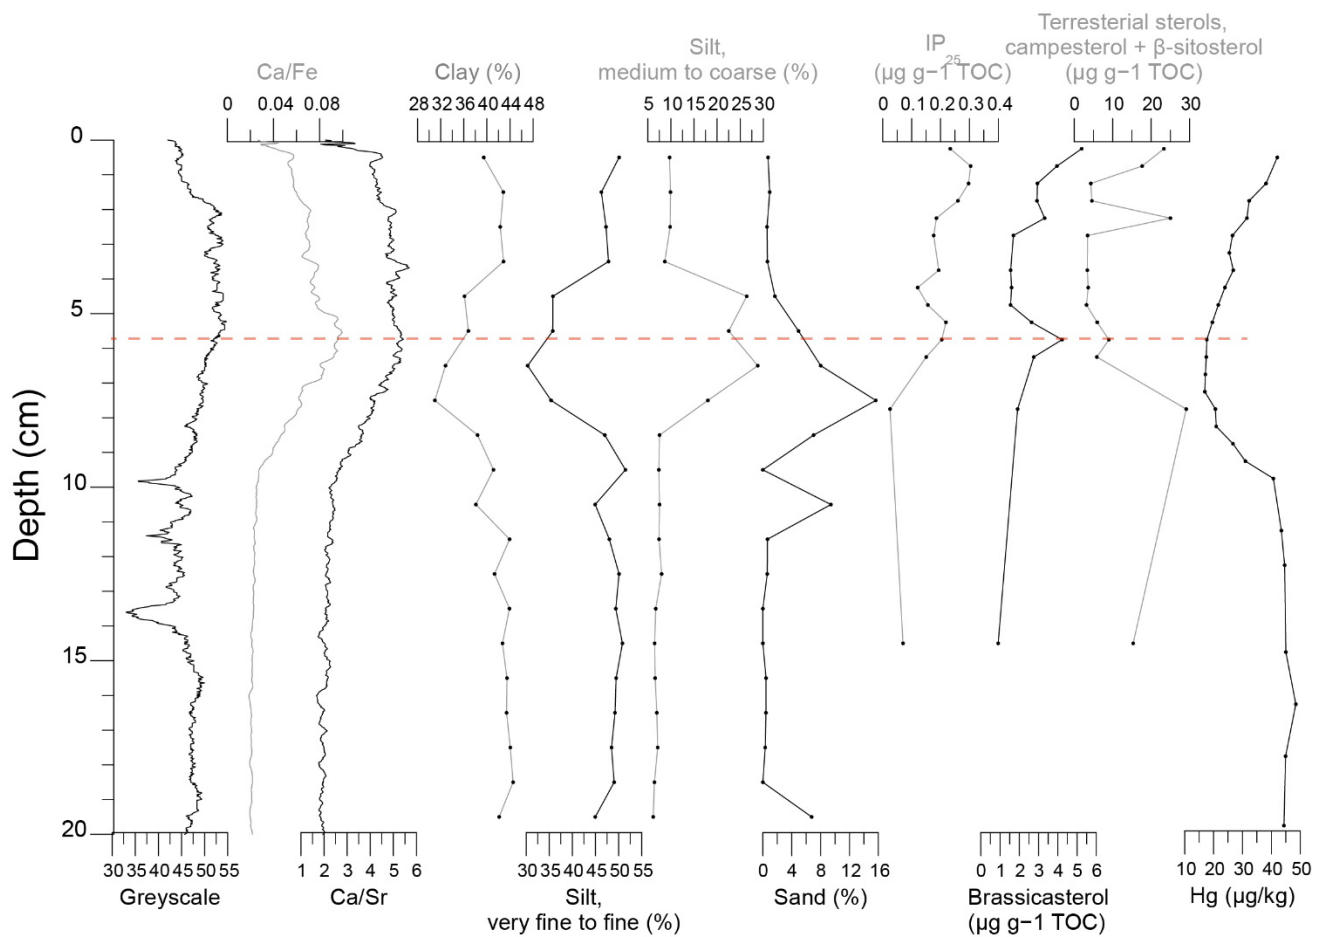

**Figure S4: Sedimentological properties (greyscale, Ca/Fe, Ca/Sr, grain size), biomarker (IP<sub>25</sub>, brassicasterol and terrestrial sterols) and Hg measurements for core 90R. The peak in sterols at 5.75 cm is shown (red dashed line).**

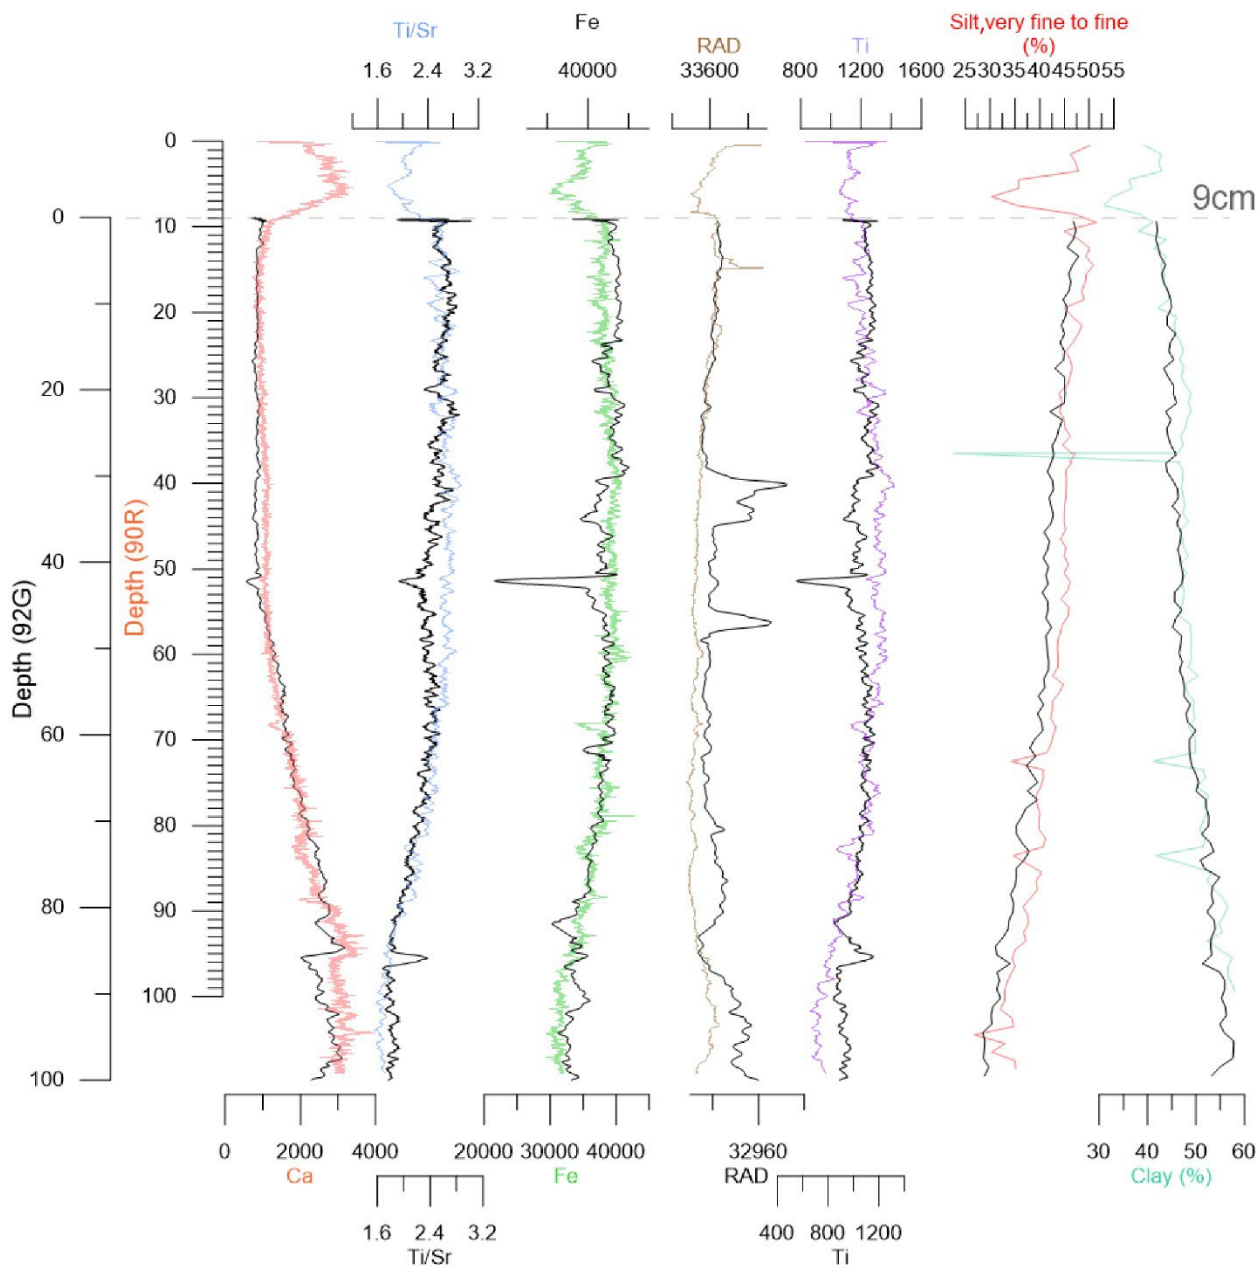

15

**Figure S5:** Selected elements (Ca, Fe, Ti), elemental ratios (Ti/Sr), RAD (X-ray intensity), and grain size (silt, clay) data used to align sediment cores DA17-NG-ST08-090R (90R) and DA17-NG-ST08-092G (92G). The amount of sediment lost from 92G is marked with a dashed line.

20
